# Supplementary material for: Spatially separated catalytic sites supplied with the CdS–MoS2–In2O3 ternary dumbbell S-scheme heterojunction for enhanced photocatalytic hydrogen production
Source: Royal Society of Chemistry journal article supplement (doi:10.1039/d2ta00839d), 2022-01-01
Supplement: d2ta00839d1.pdf [file d2ta00839d1.pdf]

# Supporting Information

## Spatially Separated Catalytic Sites Supplied with CdS-MoS<sub>2</sub>-In<sub>2</sub>O<sub>3</sub> Ternary Dumbbell S-scheme heterojunction For Enhanced Photocatalytic Hydrogen Production

Lijun Zhang<sup>1,2</sup>, Xudong Jiang<sup>1</sup>, Zhiliang Jin<sup>1\*</sup>, Noritatsu Tsubaki<sup>2\*</sup>

*1. School of Chemistry and Chemical Engineering, North Minzu University, Yinchuan  
750021, P.R.China*

*2. Department of Applied Chemistry, Graduate School of Engineering, University of Toyama,  
Gofuku 3190, Toyama 930-8555, Japan*

Corresponding author: [zl-jin@nun.edu.cn](mailto:zl-jin@nun.edu.cn), (Z. Jin) [tsubaki@eng.u-toyama.ac.jp](mailto:tsubaki@eng.u-toyama.ac.jp) (N. Tsubaki).

### 1. Experimental details Supplement

#### 1.1 Characterization methods

The morphology and crystal structure of the photocatalyst is understood by Zeiss evo10 scanning electron microscope, FEI tecnai G2 transmission electron microscope, and HORIBA Scientific X-ray diffractometer. The valence state analysis of the surface elements of the photocatalyst was performed on the ESCALAB Xi+ X-ray Photoelectron Spectrometer instrument. In-situ irradiated XPS measurements of samples with external light source irradiation ( $\lambda = 310$  nm, Shenzhen Lamplic Technology Co., Ltd.) UV-Vis-NIR diffuse reflectance spectroscopy (UV-Vis-NIR DRS) was measured using Shimadzu UV-2550 spectrometer, with BaSO<sub>4</sub> as the background. ASAP2460M was used to obtain the nitrogen adsorption-desorption isotherm of the sample at 77 K. Electron paramagnetic resonance (EPR) testing of hydroxyl and superoxide radicals was performed using a German Bruker A300-10/12. Use FLUOROMAX-4 spectrophotometer for photoluminescence spectrum test. The photoelectrochemical test was carried out in 0.2 M NaSO<sub>4</sub> solution using VersaStat4-400 electrochemical workstation.

#### 1.2 Hydrogen production experiments

The PCX-50B multi-channel photochemical reaction system of Beijing Perfectlight is used to test the performance of photocatalytic hydrogen production. A quartz bottle with a flat window at the bottom was used as the reaction vessel. The simulated solar light source is a white light 5 W LED lamp and 300 W Xe lamp (with 420 nm cut-off filter,  $\lambda \geq 420$  nm), and 10 mg photocatalyst is dispersed in 10 vol% lactic acid aqueous solution. After using ultrasonic dispersion, the system air is replaced by nitrogen. Finally, a Tianmei GC7900 gas chromatograph was used to detect hydrogen. The chromatographic column is 13X, the carrier gas is N<sub>2</sub>, and it is equipped with a TCD detector. The H<sub>2</sub> output is determined by the external standard method. The containers and experimental procedures used in the hydrogen production experiment under the natural sun are the same as those operated under the simulated solar light source. The apparent quantum efficiency (AQE) is calculated according to the following formula:

$$\begin{aligned} AQE &= \frac{\text{number of reacted electrons}}{\text{number of incident photons}} \times 100\% \\ &= \frac{2 \times \text{number of evolved } H_2 \text{ molecules}}{\text{number of incident photons}} \times 100\% \end{aligned}$$

## 2. Supporting Figures and Table

**Figure.S1.** XRD patterns of the (a) MoS<sub>2</sub>; (b) In<sub>2</sub>O<sub>3</sub>; (c) CdS-M<sub>x</sub> (x=1, 2, 3, 4.) and (d) CdS-In<sub>x</sub> (x= 10%, 20%, 30%, 40%, 50%.) samples.

**Figure.S2.** (d, e) N<sub>2</sub> adsorption-desorption isotherms of CdS, MoS<sub>2</sub>, In<sub>2</sub>O<sub>3</sub>, CdS-M<sub>2</sub>, CdS-In30% and CdS-M<sub>2</sub>-In30%.

**Figure.S3.** The pore size distribution curves of CdS, CdS-M<sub>2</sub>, CdS-In30% and CdS-M<sub>2</sub>-In30%.

**Figure.S4.** SEM morphologies of the MoS<sub>2</sub> (a); Element mapping test of CdS-M<sub>2</sub> (b); In-MOFs (c); In<sub>2</sub>O<sub>3</sub> (d).

**Figure.S5.** XRD comparison of CdS-M<sub>2</sub>-In30% photocatalyst before and after illumination.

**Figure.S6.** SEM comparison of the CdS-M<sub>2</sub>-In30% photocatalyst before and after the reaction.

**Figure.S7.** Comparison of fine spectra of S 2p XPS before and after the CdS-M<sub>2</sub>-In30% photocatalyst reaction.

**Figure.S8.** Photocatalyst coated electrode schematic.

**Figure.S9.** UV-Vis-NIR diffuse reflectance curves of MoS<sub>2</sub> (a) and In<sub>2</sub>O<sub>3</sub> (b). Kubelka-Munk function and energy graph of In<sub>2</sub>O<sub>3</sub> (c) and CdS (d).

**Figure.S10.** The schematic diagram of the scattering/reflection effect for the incident light on the surface of a Hollow structure.

**Figure.S11.** CdS(a) and In<sub>2</sub>O<sub>3</sub> (b) Mott-Schottky curve.

**Figure.S12.** CdS and In<sub>2</sub>O<sub>3</sub> Schematic diagram of the energy band.

**Figure.S13.** Schematic diagram of photo-generated electron flow between semiconductors before and after CdS-In<sub>2</sub>O<sub>3</sub> catalyst is illuminated.

**Table S1.** Parameters of CdS, MoS<sub>2</sub>, In<sub>2</sub>O<sub>3</sub>, CdS-M<sub>2</sub>(CdS-MoS<sub>2</sub>), CdS-In30%(CdS-In<sub>2</sub>O<sub>3</sub>), and CdS-M<sub>2</sub>-In30%(CdS-MoS<sub>2</sub>-In<sub>2</sub>O<sub>3</sub>) were obtained from the analysis of N<sub>2</sub>.

**Table S2.** Attenuation parameters of the catalyst.

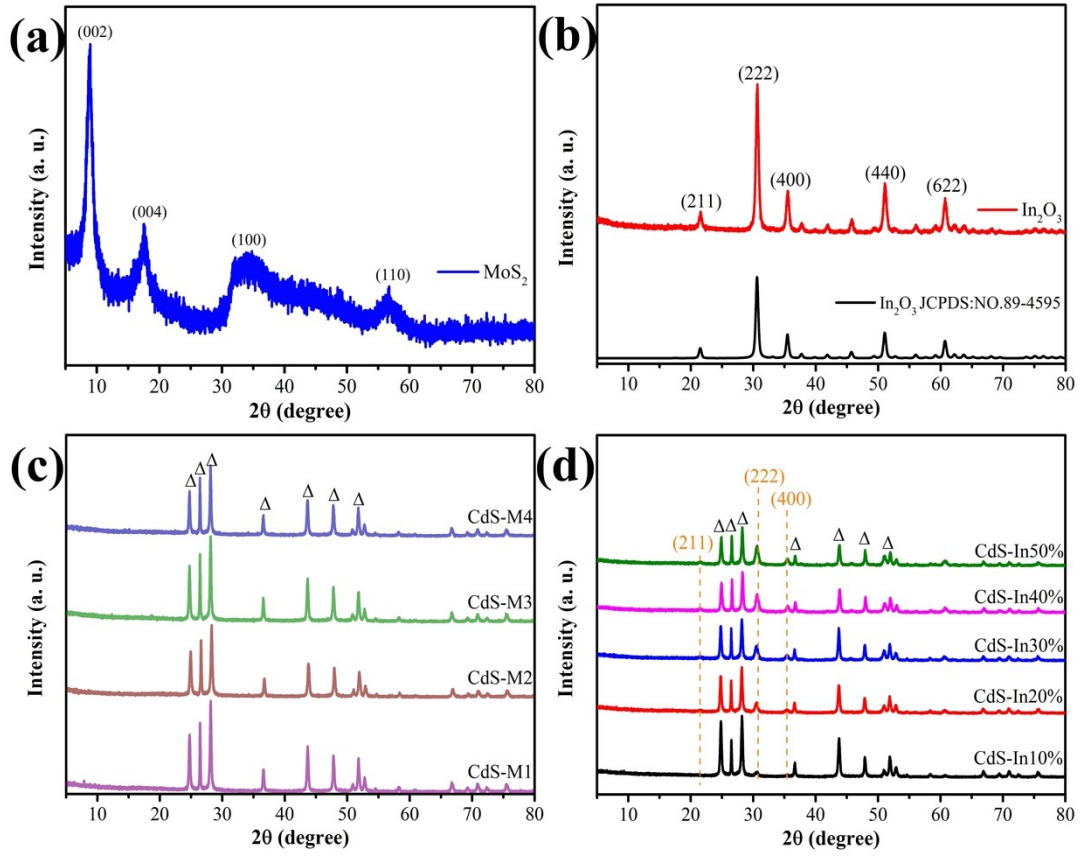

**Figure.S1.** XRD patterns of the (a)  $\text{MoS}_2$ ; (b)  $\text{In}_2\text{O}_3$ ; (c) CdS-M<sub>x</sub> (x=1, 2, 3, 4.) and (d) CdS-In<sub>x</sub> (x= 10%, 20%, 30%, 40%, 50%.) samples.

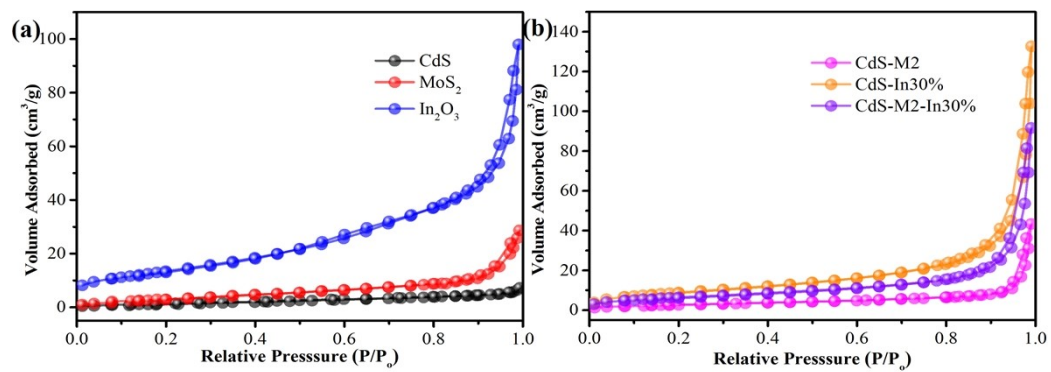

**Figure.S2.** (a, b) N<sub>2</sub> adsorption-desorption isotherms of CdS, MoS<sub>2</sub>, In<sub>2</sub>O<sub>3</sub>, CdS-M2(CdS-MoS<sub>2</sub>), CdS-In30%(CdS-In<sub>2</sub>O<sub>3</sub>) and CdS-M2-In30%(CdS-In<sub>2</sub>O<sub>3</sub>-MoS<sub>2</sub>).

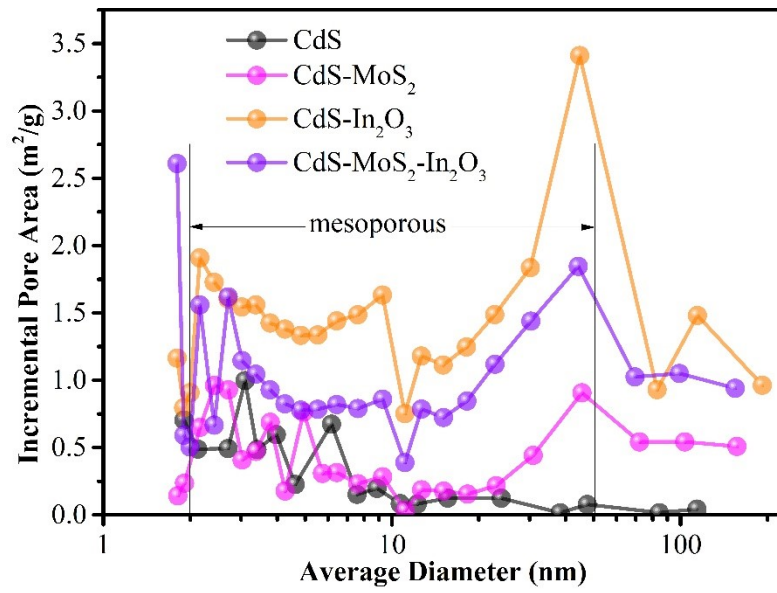

**Figure.S3.** The pore size distribution curves of CdS, CdS-M2, CdS-In30% and CdS-M2-In30%.

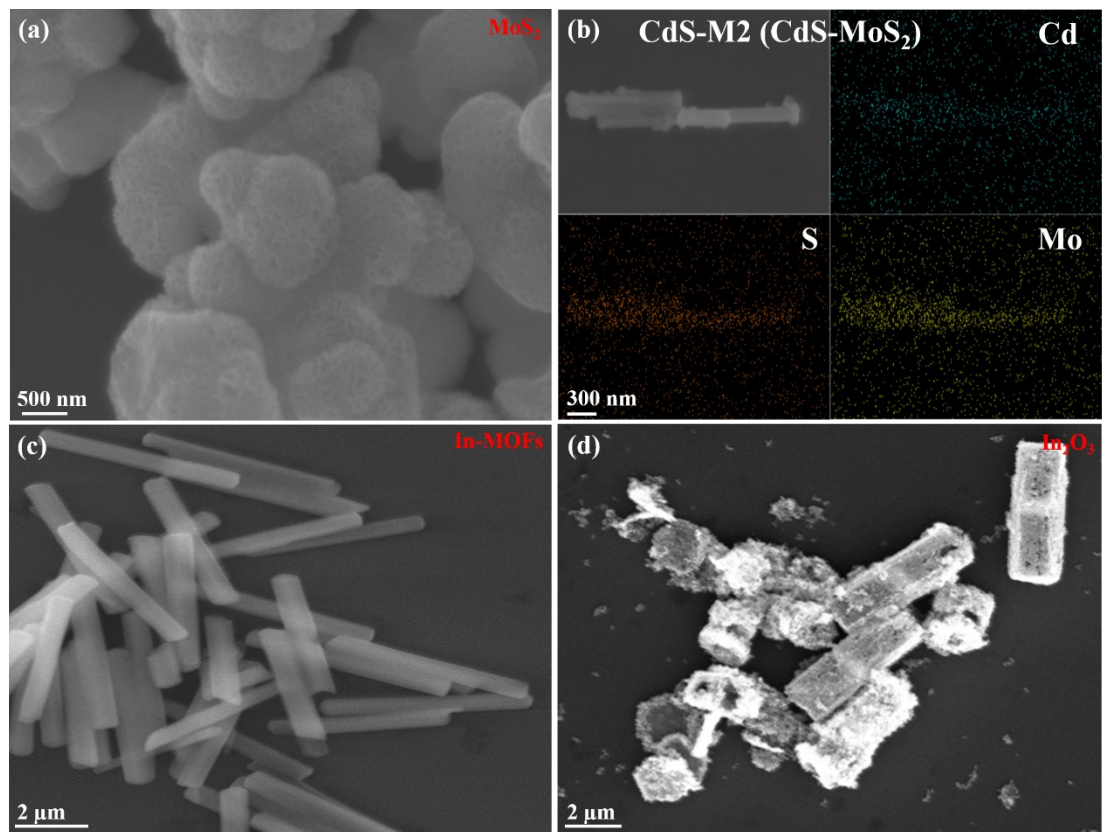

**Figure.S4.** SEM morphologies of the MoS<sub>2</sub> (a); Element mapping test of CdS-M2 (b); In-MOFs (c); In<sub>2</sub>O<sub>3</sub> (d).

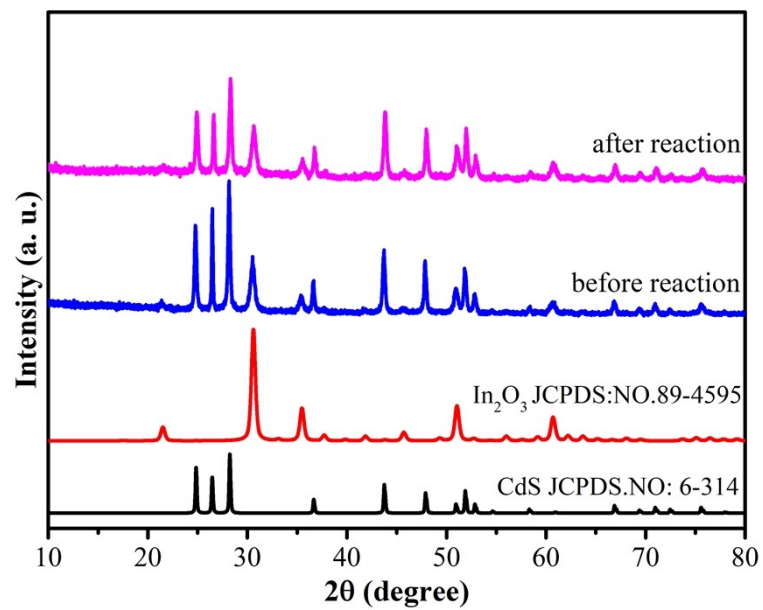

**Figure.S5.** XRD comparison of CdS-M2-In30% photocatalyst before and after illumination.



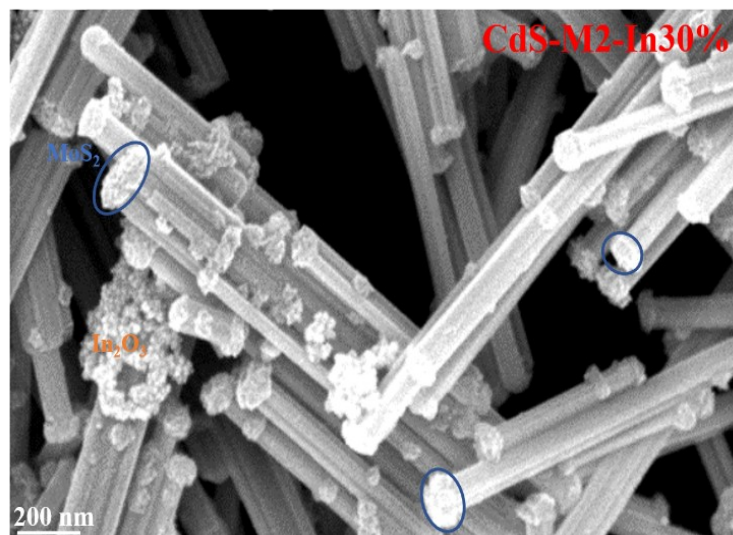

**Figure.S6.** SEM comparison of the CdS-M2-In30% photocatalyst before and after the reaction.

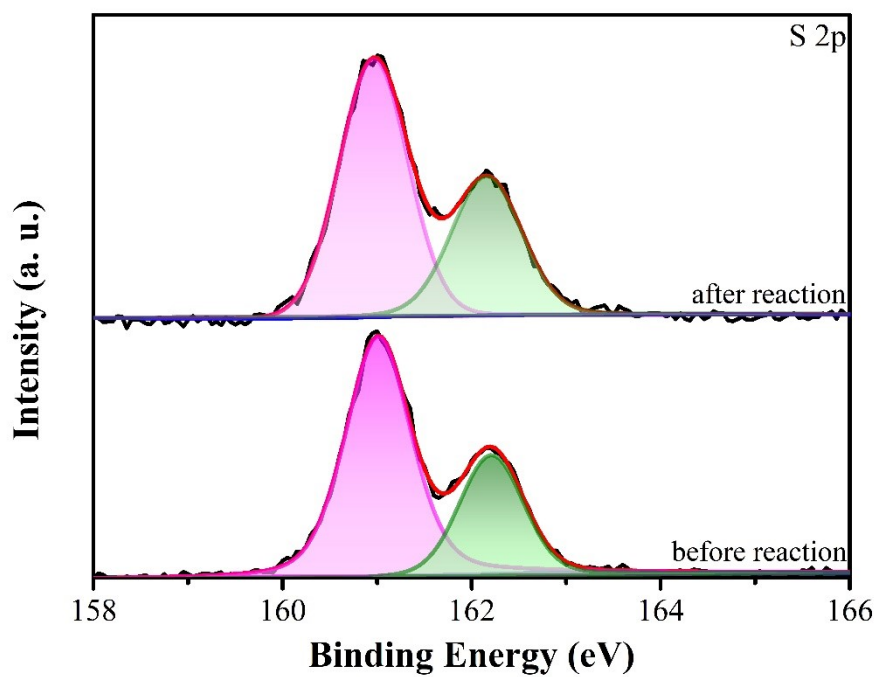

**Figure.S7.** Comparison of fine spectra of S 2p XPS before and after the CdS-M2-In30% photocatalyst reaction.

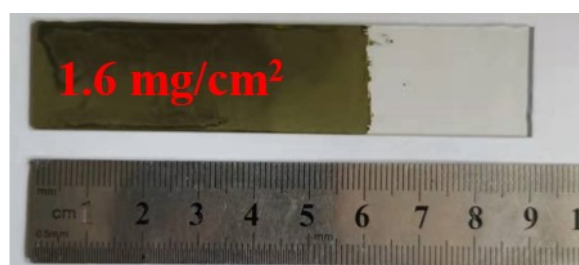

**Area: 2cm × 6cm**

**Figure. S8.** Photocatalyst coated electrode schematic.

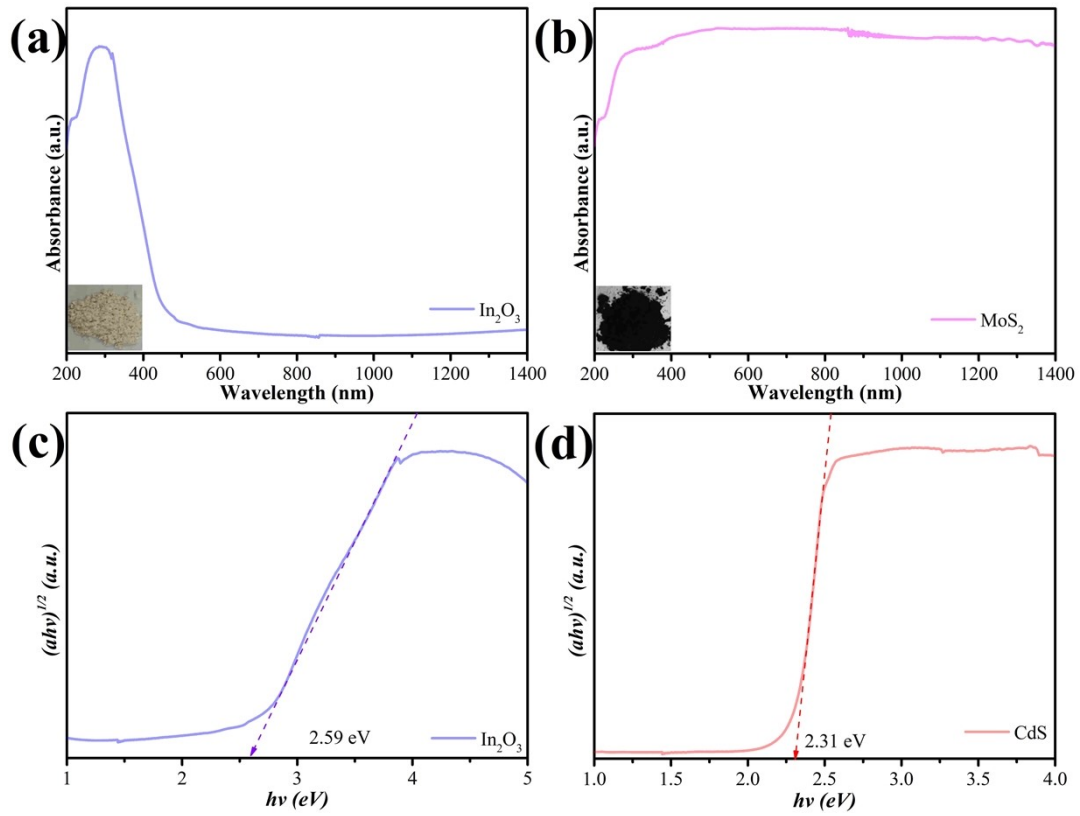

**Figure.S9.** UV-Vis-NIR diffuse reflectance curves of MoS<sub>2</sub> (a) and In<sub>2</sub>O<sub>3</sub> (b). Kubelka-Munk function and energy graph of In<sub>2</sub>O<sub>3</sub> (c) and CdS (d).

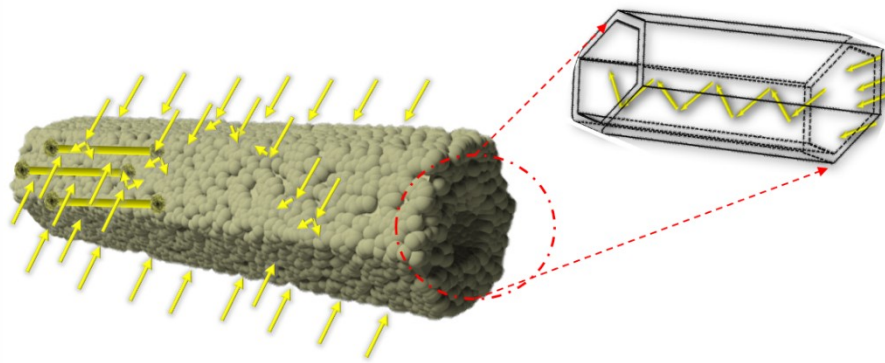

**Figure.S10.** The schematic diagram of the scattering/reflection effect for the incident light on the surface of a Hollow structure.

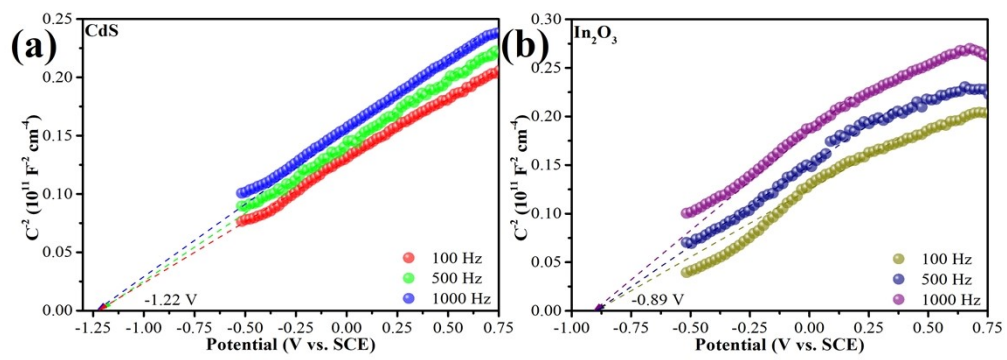

Figure.S11. CdS(a) and  $\text{In}_2\text{O}_3$  (b) Mott-Schottky curve.

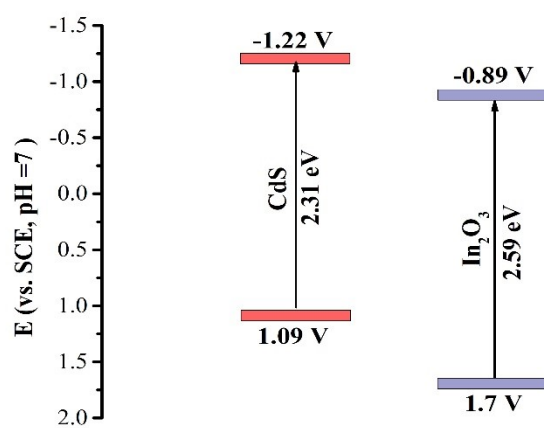

**Figure.S12.** CdS and In<sub>2</sub>O<sub>3</sub> Schematic diagram of the energy band.

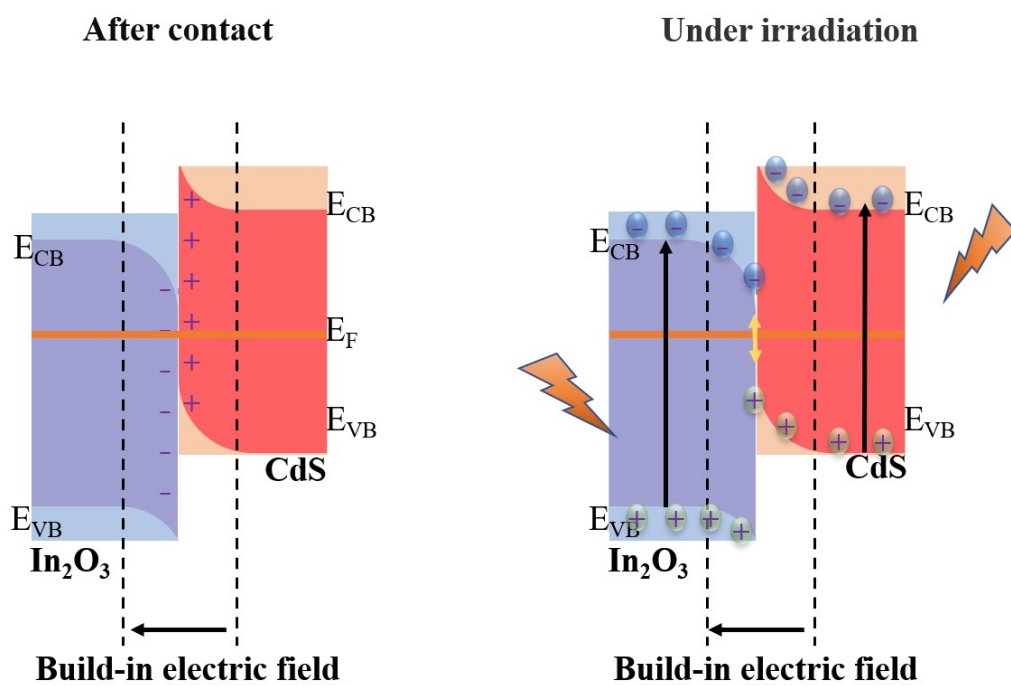

**Figure.S13.** Schematic diagram of photo-generated electron flow between semiconductors before and after CdS- $\text{In}_2\text{O}_3$  catalyst is illuminated.



**Table S1.** Parameters of CdS, MoS<sub>2</sub>, In<sub>2</sub>O<sub>3</sub>, CdS-M<sub>2</sub>(CdS-MoS<sub>2</sub>), CdS-In30%(CdS-In<sub>2</sub>O<sub>3</sub>), and CdS-M2-In30%(CdS-MoS<sub>2</sub>-In<sub>2</sub>O<sub>3</sub>) were obtained from the analysis of N<sub>2</sub>.

| Samples                                              | S <sub>BET</sub>                  | Pore volume                          | Average pore size |
|------------------------------------------------------|-----------------------------------|--------------------------------------|-------------------|
| CdS                                                  | 5 m <sup>2</sup> g <sup>-1</sup>  | 0.01 cm <sup>3</sup> g <sup>-1</sup> | 7 nm              |
| MoS <sub>2</sub>                                     | 12 m <sup>2</sup> g <sup>-1</sup> | 0.04 cm <sup>3</sup> g <sup>-1</sup> | 13 nm             |
| In <sub>2</sub> O <sub>3</sub>                       | 49 m <sup>2</sup> g <sup>-1</sup> | 0.15 cm <sup>3</sup> g <sup>-1</sup> | 12 nm             |
| CdS-MoS <sub>2</sub>                                 | 9 m <sup>2</sup> g <sup>-1</sup>  | 0.06 cm <sup>3</sup> g <sup>-1</sup> | 27 nm             |
| CdS-In <sub>2</sub> O <sub>3</sub>                   | 33 m <sup>2</sup> g <sup>-1</sup> | 0.20 cm <sup>3</sup> g <sup>-1</sup> | 24 nm             |
| CdS-MoS <sub>2</sub> -In <sub>2</sub> O <sub>3</sub> | 23 m <sup>2</sup> g <sup>-1</sup> | 0.13 cm <sup>3</sup> g <sup>-1</sup> | 23 nm             |

**Table S2.** Attenuation parameters of the catalyst.

| Samples      | Pre-exponential factors A | Lifetime            | Average lifetime | $\chi^2$ |
|--------------|---------------------------|---------------------|------------------|----------|
| CdS          | A <sub>1</sub> = 35.53    | $\tau_1$ = 5.071 ns | 1.952 ns         | 1.55     |
|              | A <sub>2</sub> = 21.62    | $\tau_2$ = 128.5 ns |                  |          |
|              | A <sub>3</sub> = 42.85    | $\tau_3$ = 0.972 ns |                  |          |
| CdS-M2       | A <sub>1</sub> = 34.39    | $\tau_1$ = 5.271 ns | 2.116 ns         | 1.55     |
|              | A <sub>2</sub> = 23.00    | $\tau_2$ = 133.1 ns |                  |          |
|              | A <sub>3</sub> = 42.61    | $\tau_3$ = 1.051 ns |                  |          |
| CdS-In30%    | A <sub>1</sub> = 42.66    | $\tau_1$ = 1.069 ns | 2.158 ns         | 1.57     |
|              | A <sub>2</sub> = 33.34    | $\tau_2$ = 5.322 ns |                  |          |
|              | A <sub>3</sub> = 24.00    | $\tau_3$ = 140.1 ns |                  |          |
| CdS-M2-In30% | A <sub>1</sub> = 33.22    | $\tau_1$ = 5.310 ns | 2.168 ns         | 1.56     |
|              | A <sub>2</sub> = 23.90    | $\tau_2$ = 138.6 ns |                  |          |
|              | A <sub>3</sub> = 42.88    | $\tau_3$ = 1.080 ns |                  |          |
